# Supplementary material for: The antimalarial drug amodiaquine stabilizes p53 through ribosome biogenesis stress, independently of its autophagy-inhibitory activity
Source: PubMed Central journal article supplement (PMC7205879; doi:10.1038/s41418-019-0387-5), 2019-07-08
Supplement: 41418_2019_387_MOESM1_ESM.pdf [file 41418_2019_387_MOESM1_ESM.pdf]

1 **Supplementary information**

2 **The antimalarial drug amodiaquine stabilizes p53 through ribosome biogenesis**  
3 **stress, independently of its autophagy-inhibitory activity**

4 Espinoza *et al*, Cell Death & Differentiation, 2019

5

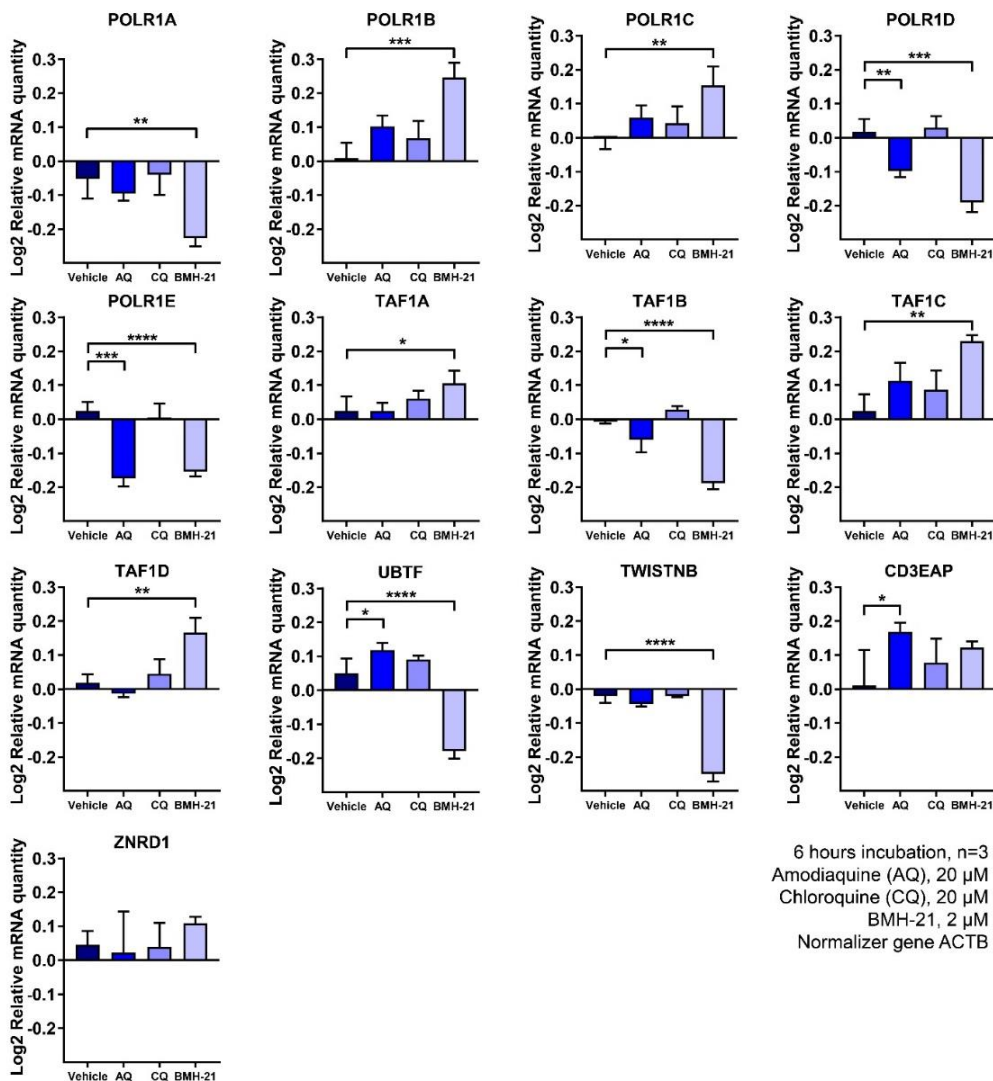

6

7 **Supplementary Figure 1. Transcriptional changes of genes that structure the**  
8 **preinitiation complex and RNA Pol I complex.** mRNA levels were assessed in U2OS  
9 cells after exposure to CQ, AQ and BMH-21 during 6 hours. Data shown as mean  $\pm$  SD  
10 of triplicate wells and are representative of triplicate treatments; Statistical significance  
11 was calculated by one-way ANOVA using log- transformed data and Dunnett's multiple  
12 test comparison (\*  $p < 0.05$ , \*\*  $p < 0.01$ , \*\*\*  $p < 0.001$ , \*\*\*\*  $p < 0.001$ )

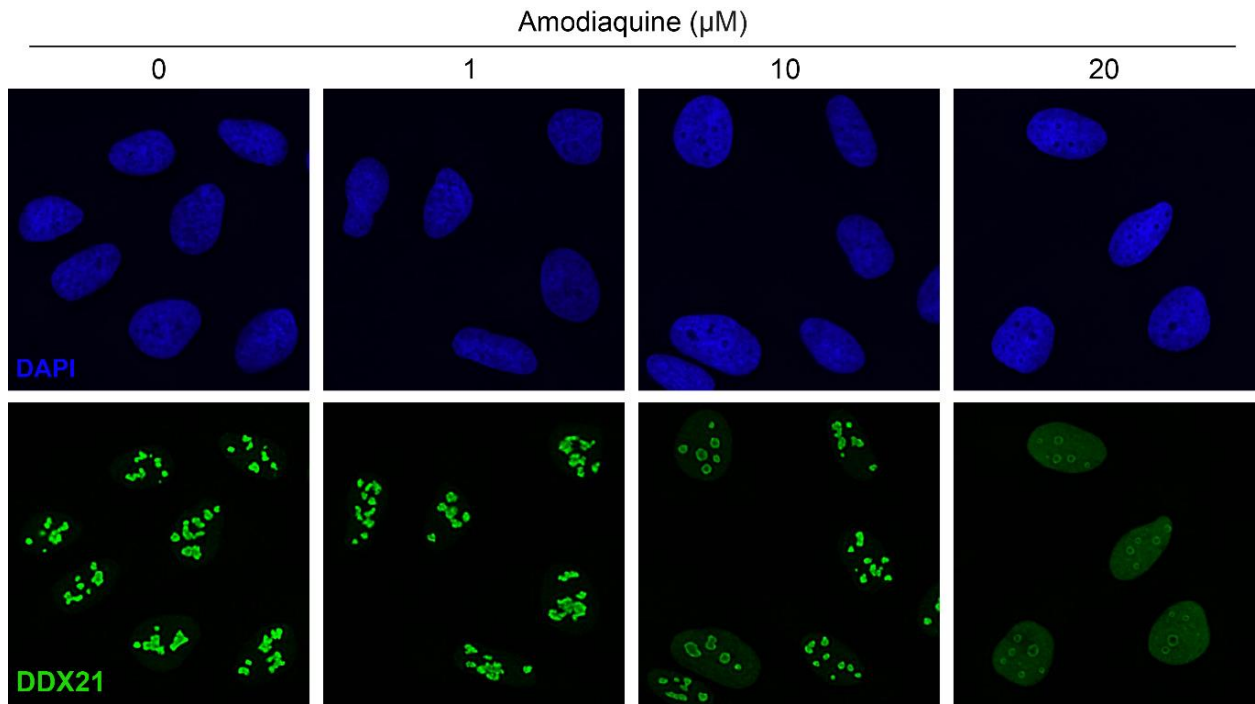

13

14 **Supplementary Figure 2. Amodiaquine treatment causes RNA helicase DDX21**  
15 **translocation into the nucleoplasm.** Immunofluorescence analysis of U2OS cells  
16 treated with increasing doses of AQ (6 hours) and immunostained for DDX21.

17

18

19

20

21

22

23

24

25

26

27

28

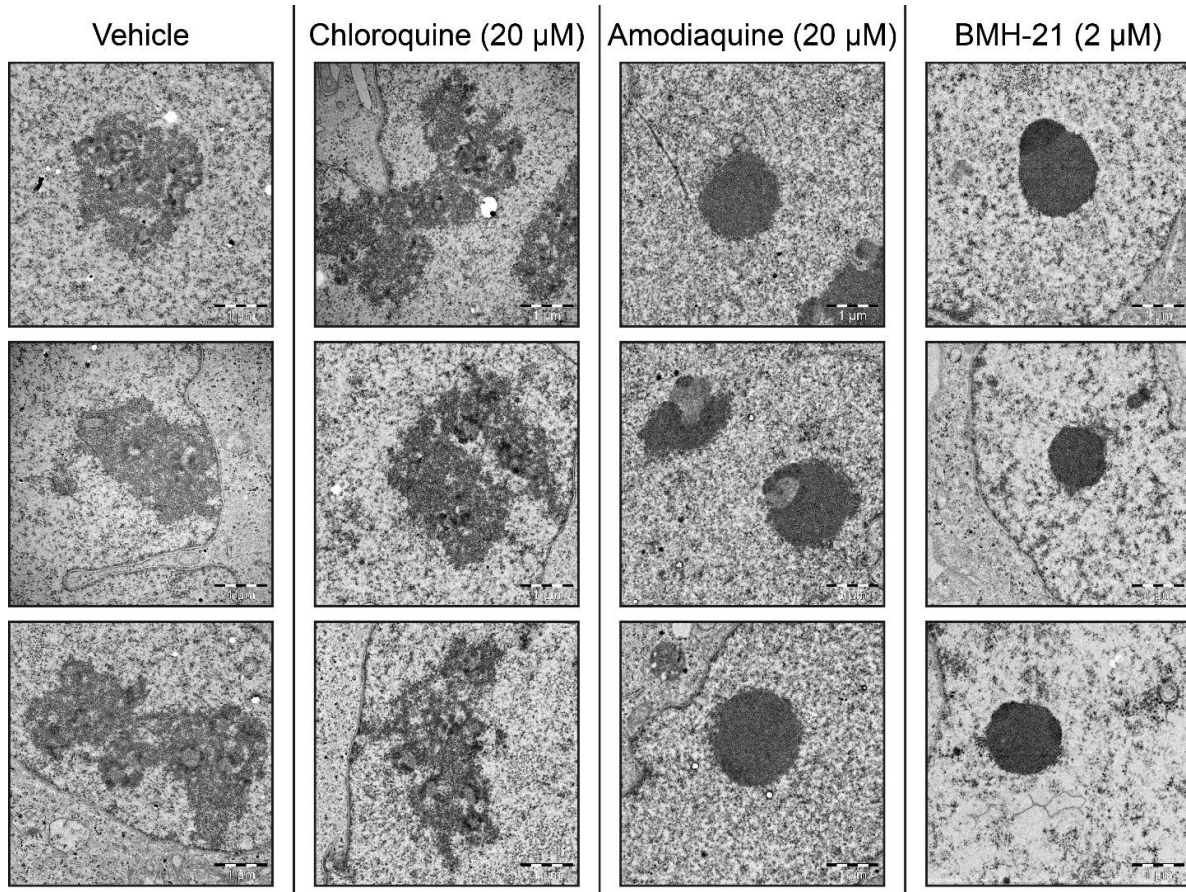

29

30 **Supplementary Figure 3.** Additional images showing the ultrastructural changes in the  
31 nucleolus after exposure to CQ, AQ and BHM-21 during 6 hours (Bar= 1  $\mu$ M).

32

33

34

35

36

37

38

39

40

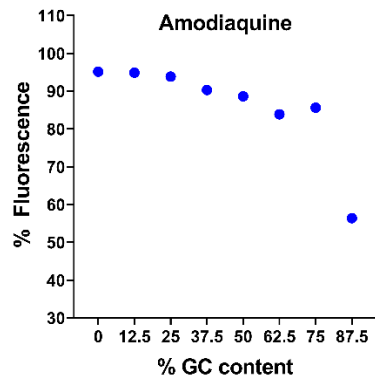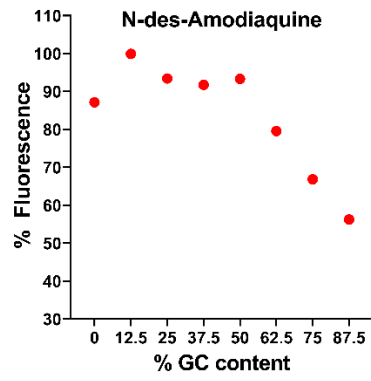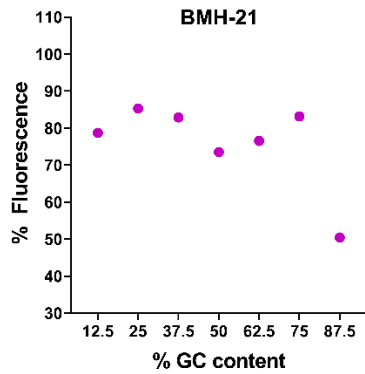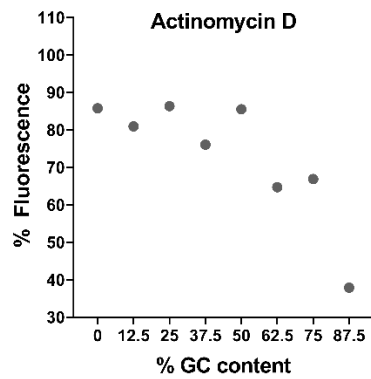

41  
 42 **Supplementary Figure 4.** Fluorescent intercalator displacement (FID) assay of  
 43 amodiaquine, N-desethyl-amodiaquine, BMH-21 and actinomycin D. Plots show  
 44 percentage of fluorescence according to the GC content.

45  
 46  
 47  
 48

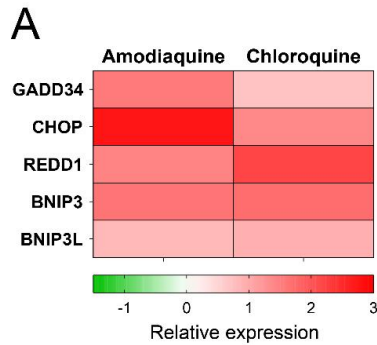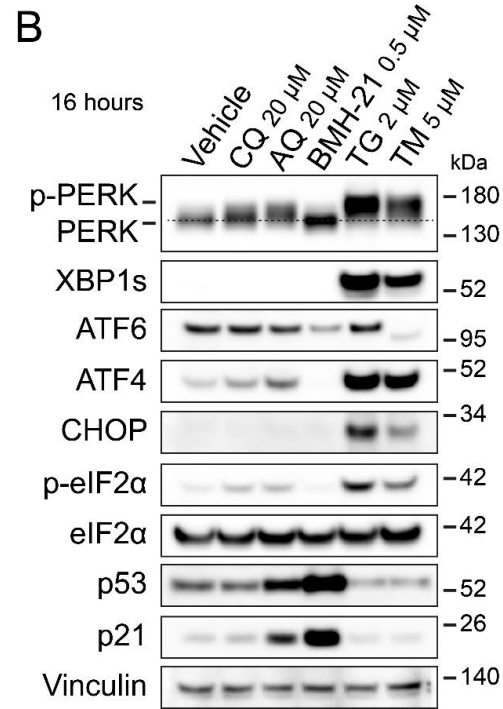

49

50 **Supplementary Figure 5. Amodiaquine and chloroquine induce a mild ER-stress.** A)

51 Amodiaquine and chloroquine induce expression of ER-stress related genes; RNAseq

52 data, relative expression compared to untreated control. B) Immunoblot analysis of ER

53 stress markers. U2OS cells were treated during 16 hours with the compounds using the

54 indicated concentrations. PERK hyperphosphorylation is observed as a shift in molecular

55 size. Thapsigargin (TG) and Tunicamycin (TM) were used as positive controls of ER

56 stress. CQ=chloroquine; AQ=Amodiaquine.

57

58

59

60

61

62

63

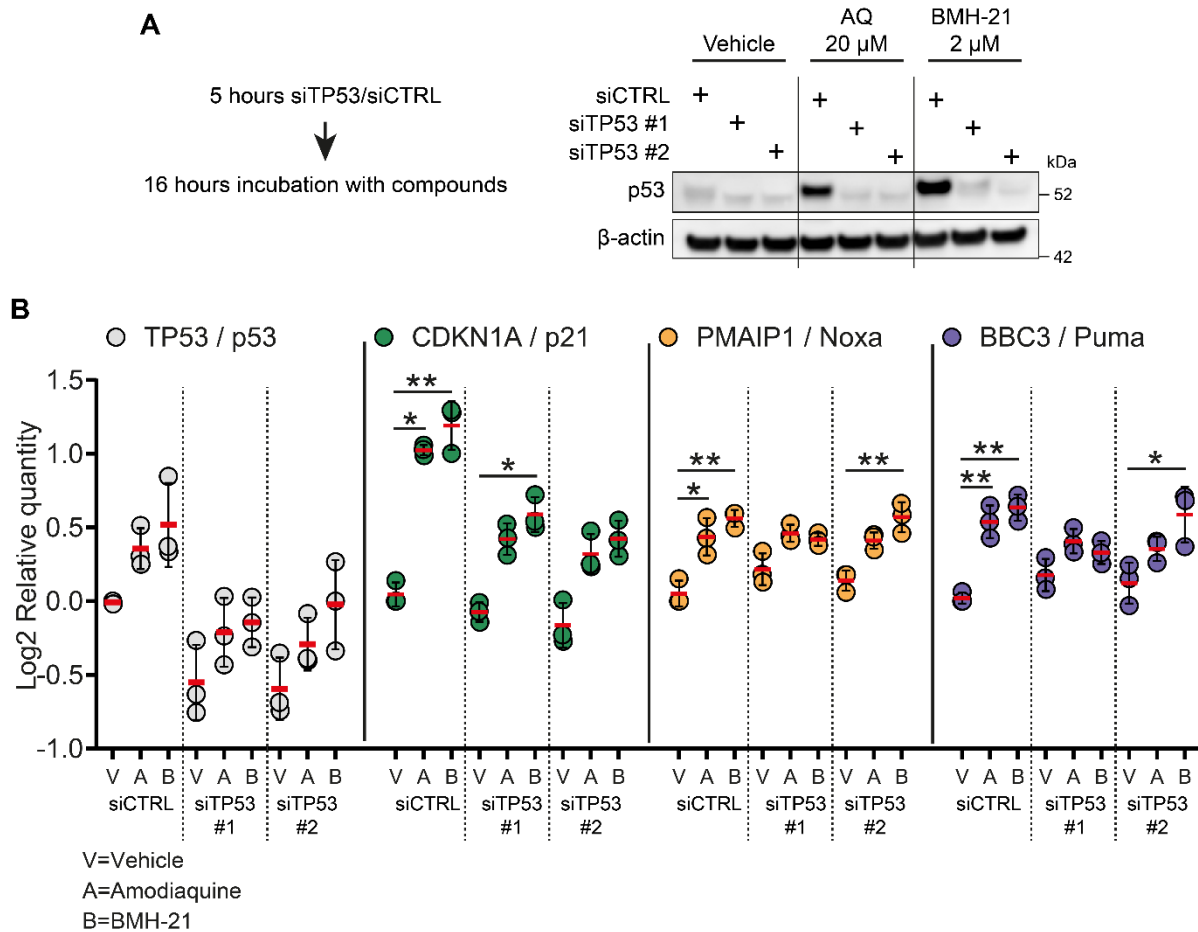

64

65 **Supplementary Figure 6. Expression of p53-regulated genes induced by**  
 66 **Amodiaquine and BMH-21.** A) U2OS cells were treated with 20 nM siRNA during 5 hours  
 67 prior to treatment with Amodiaquine and BMH-21. Immunoblot analysis showed no p53  
 68 activation after 16 hours of incubation with compounds in siTP53 treated cells. B) RT-  
 69 qPCR analysis of TP53, CDKN1A, PMAIP1 and BBC3 mRNAs in U2OS cells treated as  
 70 in A.

71

72

73

74

75

76

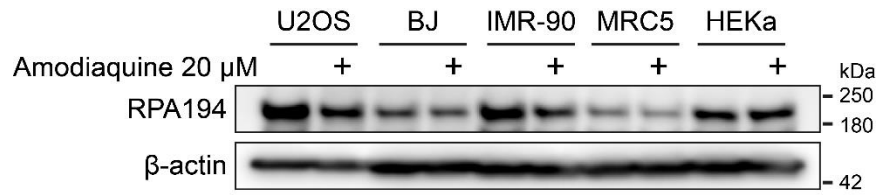

77

78 **Supplementary Figure 7. RPA194 degradation in non-transformed cells treated with**  
79 **amodiaquine.** Immunoblot analysis of RPA194 in BJ fibroblasts, IMR-90 fibroblasts,  
80 MRC5 fibroblasts and HEKa Primary Epidermal Keratinocytes treated with amodiaquine  
81 for 6 hours. U2OS cancer cell line is included as control.

82  
83  
84  
85  
86  
87  
88  
89  
90  
91  
92  
93  
94  
95  
96  
97  
98

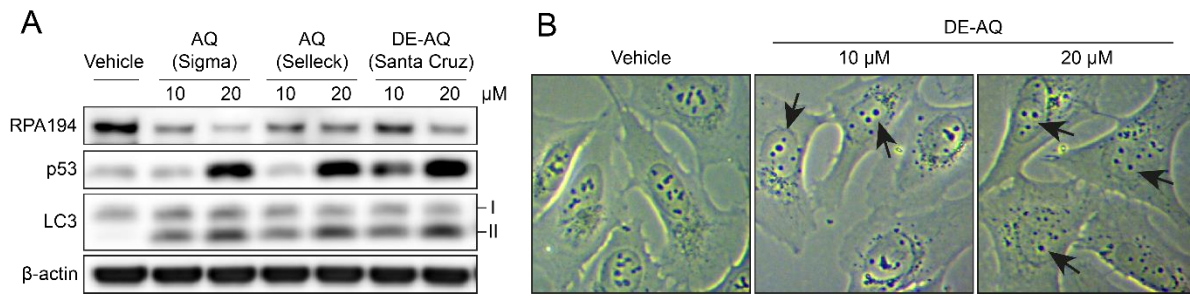

99

100 **Supplementary Figure 8. The DE-AQ metabolite has similar nucleolar disruptive**  
 101 **activity as AQ.** A) DE-AQ induces RPA194 degradation, activation of p53 and  
 102 accumulation of LC3-II. U2OS cells were treated during 6 hours with the compounds. B)  
 103 Brightfield images of U2OS cells treated with DE-AQ. Black arrows show nucleoli with  
 104 altered morphology.

105  
 106  
 107  
 108  
 109  
 110  
 111  
 112  
 113  
 114  
 115  
 116  
 117  
 118



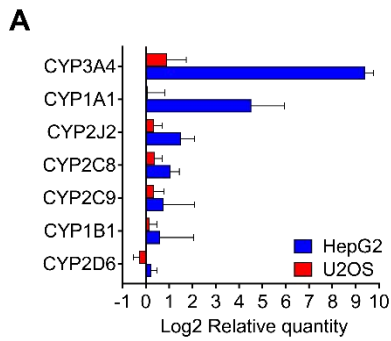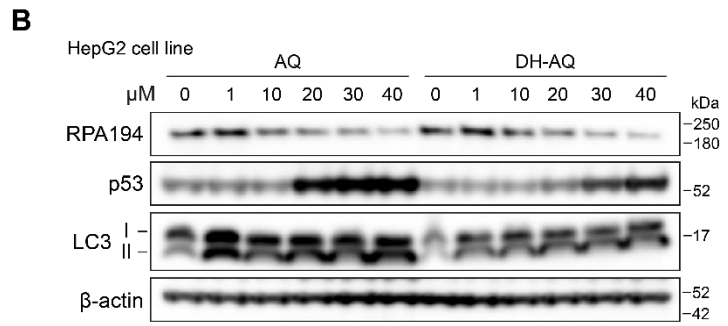

119  
 120 **Supplementary Figure 9.** A) HepG2 expresses higher levels of CYP genes than U2OS  
 121 assessed by RT-qPCR analysis, (n=3). B) Immunoblot analysis of RPA194, p53 and LC3  
 122 in HepG2 cells treated with increasing doses of AQ and its non-reactive analog DH-AQ  
 123 during 6 hours.

124  
 125  
 126  
 127  
 128  
 129  
 130  
 131  
 132  
 133  
 134  
 135  
 136  
 137  
 138  
 139

140 **Supplementary table S1. Cell lines**

| <b>Cell line</b> | <b>Tissue of origin</b>         | <b>Species</b> | <b>Medium</b>                                                          |
|------------------|---------------------------------|----------------|------------------------------------------------------------------------|
| U2OS             | Sarcoma                         | Human          | DMEM 10% FBS                                                           |
| MEF              | Fibroblast                      | Mouse          | DMEM 10% FBS                                                           |
| BJ               | Fibroblast                      | Human          | DMEM 10% FBS                                                           |
| MRC5             | Fibroblast                      | Human          | DMEM 10% FBS                                                           |
| IMR-90           | Fibroblast                      | Human          | DMEM 10% FBS                                                           |
| HepG2            | Hepatic cancer                  | Human          | DMEM 10% FBS                                                           |
| A375             | Melanoma                        | Human          | DMEM 10% FBS                                                           |
| A549             | Lung carcinoma                  | Human          | DMEM 10% FBS                                                           |
| MCF7             | Breast adenocarcinoma           | Human          | DMEM 10% FBS                                                           |
| HT-29            | Colorectal adenocarcinoma       | Human          | DMEM 10% FBS                                                           |
| RKO              | Colorectal adenocarcinoma       | Human          | DMEM 10% FBS                                                           |
| RKO ATM -/- 2.1  | Colorectal adenocarcinoma       | Human          | DMEM 10% FBS                                                           |
| RKO ATM -/- 6.3  | Colorectal adenocarcinoma       | Human          | DMEM 10% FBS                                                           |
| SK-CO-1          | Colorectal adenocarcinoma       | Human          | DMEM 10% FBS                                                           |
| SW948            | Colorectal adenocarcinoma       | Human          | DMEM 10% FBS                                                           |
| SW837            | Colorectal adenocarcinoma       | Human          | DMEM 10% FBS                                                           |
| SW1116           | Colorectal adenocarcinoma       | Human          | DMEM 10% FBS                                                           |
| T84              | Colorectal adenocarcinoma       | Human          | DMEM 10% FBS                                                           |
| LoVo             | Colorectal adenocarcinoma       | Human          | DMEM 10% FBS                                                           |
| HCT116           | Colorectal adenocarcinoma       | Human          | DMEM 10% FBS                                                           |
| LS123            | Colorectal adenocarcinoma       | Human          | DMEM 10% FBS                                                           |
| HEKa             | Primary Epidermal Keratinocytes | Human          | Dermal Cell Basal Medium + Keratinocyte Growth Kit (ATCC, PCS-200-040) |

141

142

143

144

145

146

147

148

149

150

151

152

| <b>Antibodies</b>          | <b>Company</b>      | <b>Clone</b> | <b>Catalogue No</b> | <b>Application (dilution)</b>           |
|----------------------------|---------------------|--------------|---------------------|-----------------------------------------|
| RPA194 (POLR1A) C-1        | Santa Cruz          | C-1          | sc-48385            | WB (1:2,000); IF (1:500);<br>Wes (1:50) |
| p53,                       | Abcam               | DO-1         | ab1101              | WB (1:2,000); Wes (1:50)                |
| p21                        | Cell Signaling      | DCS60        | 2946                | WB (1:1,000)                            |
| Beclin-1                   | Cell Signaling      | D4OC5        | 3495                | WB (1:2,000)                            |
| p62 (SQSTM1)               | Cell Signaling      | D5L7G        | 88588               | WB (1:2,000)                            |
| p62 (SQSTM1)               | Santa Cruz          | D-3          | sc-28359            | WB (1:2,000)                            |
| LC3B (D11) XP®             | Cell Signaling      | D11          | 3868                | IF (1:500)                              |
| LC3B                       | Cell Signaling      | Polyclonal   | 2775S               | WB (1:2,000)                            |
| β-actin                    | Abcam               | AC-15        | ab6276              | WB (1:20,000); Wes (1:150)              |
| phospho-H2AX (ser139)      | Millipore           | JBW301       | 05-636              | WB (1:1,000) / IF (1:500)               |
| ATM                        | Abcam               | 2C1          | ab78                | WB (1:1,000)                            |
| phospho-ATM (Ser1981)      | Abcam               | D6H9         | 5883S               | WB (1:1,000)                            |
| Nucleolin                  | Abcam               | Polyclonal   | ab22758             | WB (1:2,000) / IF (1:500)               |
| RPL5                       | Bethyl Laboratories | Polyclonal   | A303-933A           | WB (1:2,000)                            |
| RPL11                      | Thermo              | 3A4A7        | 37-3000             | WB (1:500)                              |
| LAMP1                      | Cell Signaling      | D4O1S        | 15665               | IF (1:500)                              |
| LAMP1                      | Cell Signaling      | C54H11       | 3243S               | WB (1:1,000)                            |
| GAPDH                      | Millipore           | Polyclonal   | AB2302              | WB (1:5,000)                            |
| DDX21                      | Novus Biologicals   | Polyclonal   | NBP1-83310          | IF (1:500)                              |
| KAP1                       | Abcam               | 20C1         | ab22553             | WB (1:1,000)                            |
| phospho-KAP1 (Ser824)      | Abcam               | EPR5248      | ab133440            | WB (1:1,000)                            |
| UBF                        | Santa Cruz          | F-9          | sc-13125            | IF (1:500)                              |
| Fibrillarin                | Abcam               | Polyclonal   | ab5821              | IF (1:500)                              |
| Anti-amodiaquine           | Thermo              | 6D10         | HYB 320-04-02       | Wes (1:25)                              |
| PERK                       | Cell Signaling      | D11A8        | 5683                | WB (1:1,000)                            |
| XBP-1s                     | Cell Signaling      | D2C1F        | 12782               | WB (1:1,000)                            |
| ATF6                       | Cell Signaling      | D4Z8V        | 65880               | WB (1:1,000)                            |
| ATF4                       | Cell Signaling      | D4B8         | 11815               | WB (1:1,000)                            |
| CHOP                       | Cell Signaling      | D46F1        | 5554                | WB (1:1,000)                            |
| Phosphor-eIF2α (Ser51)     | Cell Signaling      | Polyclonal   | 9721                | WB (1:1,000)                            |
| eIF2α                      | Cell Signaling      | Polyclonal   | 9722                | WB (1:1,000)                            |
| Vinculin                   | Abcam               | EPR8185      | ab129002            | WB (1:1,000)                            |
| Anti-chicken HRP           | Thermo              | Polyclonal   | A16054              | WB / 1:5000                             |
| Anti-mouse Alexa-647       | Thermo              | Polyclonal   | A-21235             | IF / 1:1000                             |
| Anti-mouse Alexa-488       | Thermo              | Polyclonal   | A-11029             | IF / 1:1000                             |
| Anti-rabbit Alexa-647      | Thermo              | Polyclonal   | A-21244             | IF / 1:1000                             |
| Anti-rabbit Alexa-488      | Thermo              | Polyclonal   | A-11008             | IF / 1:1000                             |
| Goat Anti-Mouse IgG (Cy3)  | Abcam               | Polyclonal   | ab97035             | WB / 1:1000                             |
| Goat Anti-Rabbit IgG (Cy5) | Abcam               | Polyclonal   | ab97077             | WB / 1:1000                             |

155 **Supplementary table S3. Chemicals**

| <b>Chemical</b>                      | <b>Company</b>           | <b>Catalogue code</b> | <b>Solvent</b> |
|--------------------------------------|--------------------------|-----------------------|----------------|
| Amodiaquin dihydrochloride dihydrate | Sigma-Aldrich            | A2799                 | Water          |
| Amodiaquin dihydrochloride dihydrate | Selleck Chemicals        | S4589                 | Water          |
| N-Desethyl Amodiaquine Hydrochloride | Santa Cruz Biotechnology | sc-212178             | Water          |
| Chloroquine diphosphate salt         | Sigma-Aldrich            | C6628                 | Water          |
| Hydroxychloroquine sulfate           | Sigma-Aldrich            | H0915                 | Water          |
| Doxorubicin                          | Sigma-Aldrich            | D1515                 | DMSO           |
| KU-60019                             | Selleck Chemicals        | S1570                 | DMSO           |
| Aloxistatin                          | Selleck Chemicals        | S7393                 | DMSO           |
| Pepstatin A                          | Selleck Chemicals        | S7381                 | DMSO           |
| Bafilomycin A1                       | Selleck Chemicals        | S1413                 | DMSO           |
| Lys05 trihydrochloride               | MedKoo Biosciences       | 406969                | DMSO           |
| BMH-21                               | Sigma-Aldrich            | SML1183               | DMSO           |
| MG-132                               | Selleck Chemicals        | S2619                 | DMSO           |
| CX-5461                              | Cellagen Technologies    | C2954                 | DMSO           |
| Cycloheximide                        | Sigma-Aldrich            | C7698                 | DMSO           |
| Actinomycin D                        | Sigma-Aldrich            | A1410                 | DMSO           |
| Thapsigargin                         | Abcam                    | ab120286              | DMSO           |
| Tunicamycin                          | Cayman chemicals         | 11445                 | DMSO           |
| Clotrimazole                         | Sigma-Aldrich            | C6019                 | DMSO           |

156

157

158

159

160

161

162

163

164

165

166

167

168

169

170

**Supplementary table S4.** RT-qPCR primer sequences

| Target            | Forward                   | Reverse                    |
|-------------------|---------------------------|----------------------------|
| 47S_5'ETS*        | GAACGGTGGTGTGTCGTT        | GCGTCTCGTCTCGTCTCACT       |
| 18S_5'-junction*  | GCCGCGCTCTACCTTACCTACCT   | CAGACATGCATGGCTTAATCTTTG   |
| 18S_3'-junction*  | AGTCGTAACAAGGTTTTCCGTAGGT | CCTCCGGGCTCCGTTAAT         |
| 5.8S_5'-junction* | TACGACTCTTAGCGGTGGATCA    | TCACATTAATTCTCGCAGCTAGCT   |
| 5.8S_3'-junction* | GAATTGCAGGACACATTGATCATC  | GGCAAGCGACGCTCAGA          |
| 28S_5'-junction*  | CCGAGACGCGACCTCAGAT       | TCCGCTGACTAATATGCTTAAATTCA |
| 18S*              | GATGGTAGTCGCCGTGCC        | GCCTGCTGCCCTTCCTTGG        |
| 5.8S*             | ACTCGGCTCGTGCCTC          | GCGACGCTCAGACAGG           |
| 28S*              | GTGACGCGCATGAATGGA        | TGTGGTTTTCGCTGGATAGTAGGT   |
| GAPDH             | ACCTGACCTGCCGTCTAGAAAA    | CAAAGTGGTCGTTGAGGGCAAT     |
| ACTB              | TCACAATGTGGCCGAGGACTTT    | AGAAGTGGGGTGGCTTTTAGGA     |
| POLR1A            | TTTGCCGTGTATGGCATCGC      | TGTCATCTGCTGTAGCGGGG       |
| POLR1B            | TGAGTGGGGCGGAATATGGG      | CTGCGGTTTTCGTTTTCTCGG      |
| POLR1C            | TTGCCCGGGTTCGAGATCATT     | TGATGGCTTCACTACCAGCA       |
| POLR1D            | TGCACGAGGAAGACCATACCC     | ACAGCTGGAAGGGTACCTCG       |
| POLR1E            | GTGACTGCTCTGGTCAGCGA      | ACACGTCTTCAGGCTTGGCT       |
| TAF1A             | GCAGGAGGAGTTACGAGCCG      | TCCGGCCACGTGAAGAAAT        |
| TAF1B             | CCCCGTCAGCAAAGCATCAC      | GGCAAGTGTCTGTGGCATGG       |
| TAF1C             | CTCCCTCACTGGCTGACCTG      | CTGCATTGCCTGCAGAAGGG       |
| TAF1D             | TGGGCCACGGAATAGCCAA       | CTGGCCTGGTGTCTTAGAGC       |
| UBTF              | TCATAAGGCCCTGGAGCAGC      | ACTTGTCTTGTAGCTGGCGT       |
| TWISTNB           | GAGTTGCCGACTTATGCCGC      | CTGTTCTCGAATGCCGGTGC       |
| CD3EAP            | GCTCCCGGATGATGCCCTAC      | AACCGAGCAGCATCCTCACC       |
| ZNRD1             | AACTCCCTCCTCAGACCCGA      | GTGACCGTATCCTGAGCCCC       |
| CYP3A4            | AGCACCGAGTGGATTTCTTCAG    | GCTCCAGATCGGACAGAGCTTT     |
| CYP1A1            | TACCTACCCAACCCTTCCCTGAAT  | TCAATCAGGCTGTCTGTGATGTCC   |
| CYP2J2            | CATCACCTTCGGAGAACGCT      | GGGTCCAGGCAGGAATTTCA       |
| CYP2C8            | CTTGGTTGGCACTGTAGCTGATCT  | TCCTGGACTTTAGCTGTGACCTCT   |
| CYP2C9            | TCTATGGCCCTGTGTTCACTCTG   | CAGGGCTTCCCTTCACTGCTTCATA  |
| CYP1B1            | ACCAGGTATCCTGATGTGCAGACT  | GCTTCATAAAGGAAGGCCAGGACA   |
| CYP2D6            | ATTCATGAGGTGCAGCGCTTTG    | CTCATCCTTCAGCACCGATGACA    |
| TP53 (p53)        | CAGTTGGGCAGCTGGTTAGG      | ATCCTCCAGGGTGTGGGATG       |
| CDKN2A (p21)      | AATCGTCCAGCGACCTTCTT      | CTGACTCCTTGTCCGCTGC        |
| PMAIP1 (Noxa)     | TACCGCTGGCCTACTGTGAA      | ATGTGCTGAGTTGGCACTGA       |
| BBC3 (Puma)       | GCGATTGCGATTGGGTGAGA      | TACTTCTGCCCTGCTCTGG        |

172 \*Sequences obtained from Kwon *et al*, 2014.

173

174

175

176

177

178 **Supplementary table S5. ChIP-qPCR primer sequences**

| rDNA region | Position | Forward                   | Position | Reverse               |
|-------------|----------|---------------------------|----------|-----------------------|
| upstream    | -988     | GCTTCTCGACTCACGGTTTC      | -798     | GGAGCTCTGCCTAGCTCACA  |
| upstream    | -410     | GATCCTTTCTGGCGAGTCC       | -272     | GGAGCCGGAAGCATT TTC   |
| promoter    | -48      | GAGGTATATCTTTTCGCTCCGAGTC | -14      | CAGCAATAACCCGGCGG     |
| promoter    | -46      | GGTATATCTTTTCGCTCCGAG     | 13       | AGCGACAGGTCGCCAGAGGA  |
| 5'ETS       | 851      | GAACGGTGGTGTGTCGTT        | 961      | GCGTCTCGTCTCGTCTCACT  |
| 5'ETS       | 1297     | CAGGTGTTTCCTCGTACCG       | 1483     | GCTACCATAACGGAGGCAGA  |
| 18S         | 4013     | AAACGGCTACCACATCCAAG      | 4148     | CCTCCAATGGATCCTCGTTA  |
| 18S         | 4446     | CCCGAAGCGTTACTTTGAA       | 4612     | CGGTCCAAGAATTTACACCTA |
| 28S         | 10319    | GAAC TTTGAAGGCCGAAGTG     | 10450    | ATCTGAACCCGACTCCCTTT  |
| 28S         | 12293    | TGGGTTTTAAGCAGGAGGTG      | 12472    | AACCTGTCTCACGACGGTCT  |
| IGS         | 18449    | TGGTGGGATTGGTCTCTCTC      | 18572    | CAGCCTGCGTACTGTGAAAA  |
| IGS         | 30541    | ACTGGCGAGTTGATTTCTGG      | 30621    | CGAGACAGTCGAGGGAGAAG  |

179 \*Sequences obtained from Peltonen *et al*, 2014.

180

181

182 **Supplementary table S6. FID oligo hairpins**

| Sequence (5'-3')      | GC content (%) |
|-----------------------|----------------|
| TTTATATAAAAAATATATAAA | 0              |
| CAATAAATAAAAAATTTATTG | 12.5           |
| CATAATTCAAAAAGAATTATG | 25             |
| CGAATAACAAAAAGTTATTCG | 37.5           |
| CGAGAATCAAAAACATTCTCG | 50             |
| CGATGCACAAAAAGTGCATCG | 62.5           |
| CGCGAACCAAAAAGGTTGCGG | 75             |
| CGGCCTGCAAAAAGCAGGCCG | 87.5           |

183
